# Supplementary material for: Systematic Review of Low‐Density Lipoprotein Cholesterol Apheresis for the Treatment of Familial Hypercholesterolemia
Source: PubMed Central journal article supplement — J Am Heart Assoc. 2016 Jul 6;5(7):e003294. doi: 10.1161/JAHA.116.003294 (PMC5015370; doi:10.1161/jaha.116.003294), 2016-07-06
Supplement: JAH3-5-e003294-s001.pdf [file JAH3-5-e003294-s001.pdf]

## **SUPPLEMENTAL MATERIAL**

**Table S1. Search terms for the PubMed database**

| Search Element                     | Search Terms                                           |                                                                                                                                                                                                                                                                                                                                                                                                                                                                                                                                                                                                                                                                                                                                                                                                                                                                                                                                                                                                                                                                                                            |
|------------------------------------|--------------------------------------------------------|------------------------------------------------------------------------------------------------------------------------------------------------------------------------------------------------------------------------------------------------------------------------------------------------------------------------------------------------------------------------------------------------------------------------------------------------------------------------------------------------------------------------------------------------------------------------------------------------------------------------------------------------------------------------------------------------------------------------------------------------------------------------------------------------------------------------------------------------------------------------------------------------------------------------------------------------------------------------------------------------------------------------------------------------------------------------------------------------------------|
| <i>Initial Search Filters</i>      | <i>English language, abstract available, 2000-2013</i> |                                                                                                                                                                                                                                                                                                                                                                                                                                                                                                                                                                                                                                                                                                                                                                                                                                                                                                                                                                                                                                                                                                            |
| Disease condition                  | 1                                                      | ("Familial Hypercholesterolemia" [All Fields] OR "Hyperlipidemia, Familial Combined"[Mesh])                                                                                                                                                                                                                                                                                                                                                                                                                                                                                                                                                                                                                                                                                                                                                                                                                                                                                                                                                                                                                |
| Intervention                       | 2                                                      | ("blood component removal"[MeSH Terms] OR apheresis [All fields])                                                                                                                                                                                                                                                                                                                                                                                                                                                                                                                                                                                                                                                                                                                                                                                                                                                                                                                                                                                                                                          |
| Practice patterns                  | 3                                                      | ("guidelines"[All fields] OR "practice pattern"[All fields] OR "Guideline" [Publication Type])                                                                                                                                                                                                                                                                                                                                                                                                                                                                                                                                                                                                                                                                                                                                                                                                                                                                                                                                                                                                             |
| Healthcare utilization / economics | 4                                                      | ("Physician Visits" [All fields] or "Ambulatory Visit" [All fields] or "Hospital Admission" [All fields] or "Length of Stay" [All fields] or "Health Economics" [All fields] or "Economic Model" [All fields] or "Medical Resource Use" [All fields] or "Medical Resource Utilization" [All fields] or "Health Economic Resource Utilization" [All fields] or "Healthcare Resource Utilization" [All fields] or "Cost Effectiveness" [All fields] or "Budget Impact" [All fields] or "Cost Utility" [All fields] or "Healthcare Utilization" [All fields] or "Healthcare Cost" [All fields] or "Direct Cost" [All fields] or "Pharmaceutical Cost" [All fields] or "Hospital Cost" [All fields] or "Inpatient Cost" [All fields] or "Laboratory Cost" [All fields] or "ER Cost" [All fields] or "Ambulatory Cost" [All fields] or "Outpatient Cost" [All fields] or "Total Cost of Care" [All fields] or "Cost-Benefit Analysis"[Mesh] or "Costs and Cost Analysis"[Mesh] or "Health Services/utilization"[Mesh] or "Health Services/economics"[Mesh] or "cost"[All fields] or "Health Care Costs" [MeSH]) |
| Utilities                          | 5                                                      | ("Cost-effectiveness"[All Fields] OR "Cost-value"[All Fields] OR "Cost-benefit"[All Fields] OR "Cost-Benefit Analysis"[Mesh] OR "Cost-utility" [All Fields] OR "Utility Score" [All Fields] OR "Utility value" [All Fields])                                                                                                                                                                                                                                                                                                                                                                                                                                                                                                                                                                                                                                                                                                                                                                                                                                                                               |
| CV events                          | 6                                                      | "Myocardial Infarction" [MeSH] OR "Myocardial Infarction" [All [Fields] OR "Heart attack" [All Fields] OR Angina [All fields] OR "Heart Failure" [MeSH] OR "Heart Failure" [All Fields] OR "Ischemic Attack, Transient" [MeSH] OR Stroke [MeSH] OR Stroke [All Fields] OR "Cerebral Revascularization" [MeSH] OR "Cerebral Revascularization" [All Fields] OR                                                                                                                                                                                                                                                                                                                                                                                                                                                                                                                                                                                                                                                                                                                                              |

|                                                                          |           |                                                                                                                                                                                                                                                                                                                                                                                                                                                            |            |
|--------------------------------------------------------------------------|-----------|------------------------------------------------------------------------------------------------------------------------------------------------------------------------------------------------------------------------------------------------------------------------------------------------------------------------------------------------------------------------------------------------------------------------------------------------------------|------------|
|                                                                          |           | <p>“Myocardial Revascularization” [MeSH] OR<br/> “Myocardial Revascularization” [All Fields] OR<br/> "Peripheral Arterial Disease"[MeSH] OR<br/> “Cerebrovascular Disorders” [MeSH] OR “Coronary<br/> Artery Disease” [MeSH] OR “Coronary Artery<br/> Disease” [All Fields] OR “Cardiovascular Diseases”<br/> [MeSH] OR “Cardiovascular Diseases” [All Fields]<br/> OR “Cardiovascular” [All Fields] OR "Cardiovascular<br/> Diseases/economics"[MAJR]</p> |            |
| Summation                                                                |           |                                                                                                                                                                                                                                                                                                                                                                                                                                                            |            |
| FH + Apheresis                                                           | <b>7</b>  | <b>1 AND 2</b>                                                                                                                                                                                                                                                                                                                                                                                                                                             | <b>156</b> |
| FH + Apheresis +<br>Practice patterns                                    | <b>8</b>  | <b>1 AND 2 AND 3</b>                                                                                                                                                                                                                                                                                                                                                                                                                                       | <b>7</b>   |
| FH + Apheresis +<br>HRU                                                  | <b>9</b>  | <b>1 AND 2 AND 4</b>                                                                                                                                                                                                                                                                                                                                                                                                                                       | <b>6</b>   |
| FH + Utilities                                                           | <b>10</b> | <b>1 AND 5</b>                                                                                                                                                                                                                                                                                                                                                                                                                                             | <b>3</b>   |
| FH + Apheresis +<br>CV event                                             | <b>11</b> | <b>1 AND 2 AND 6</b>                                                                                                                                                                                                                                                                                                                                                                                                                                       | <b>108</b> |
| FH + Apheresis +<br>Practice patterns+<br>HRU + Utilities +<br>CV events | <b>12</b> | <b>8-11 (OR)</b>                                                                                                                                                                                                                                                                                                                                                                                                                                           | <b>111</b> |

**Table S2. Familial hypercholesterolemia treatment guideline recommendations**

| <b>Familial Hypercholesterolaemia Australasia Network Consensus Group (Australian Atherosclerosis Society) 2011 (Australia)<sup>1</sup></b> |                                                                                                                                                                                                                                                             |
|---------------------------------------------------------------------------------------------------------------------------------------------|-------------------------------------------------------------------------------------------------------------------------------------------------------------------------------------------------------------------------------------------------------------|
| Guideline type                                                                                                                              | FH treatment                                                                                                                                                                                                                                                |
| Patients                                                                                                                                    | (1) HoFH<br>(2) Compound HeFH (HeFH with other lipid disorders)<br>(3) Treatment-refractory HeFH with CHD<br>(4) Children with HoFH<br>(5) Women with HoFH/HeFH, stable CHD, and who have discontinued lipid-lowering therapy                               |
| Thresholds for apheresis treatment                                                                                                          | HoFH: LDL-C > 271 mg/dL<br>Compound HeFH: LDL-C > 271 mg/dL<br>HeFH with CHD and are treatment-refractory: LDL-C > 193 mg/dL<br>Alternative criterion for HoFH and HeFH: < 50% reduction with pharmacotherapy                                               |
| Frequency                                                                                                                                   | Adjusted according to treatment targets                                                                                                                                                                                                                     |
| Targets                                                                                                                                     | HoFH: time-average interval plasma LDL-C: 251 mg/dL<br>HeFH: time-average interval plasma LDL-C: 97 mg/dL<br>Mean plasma reduction between treatments: > 65%<br>Targets typically require an acute LDL-C reduction $\geq$ 70% (immediately after apheresis) |
| <b>Japanese National Guidelines 2012 (Japan)<sup>2</sup></b>                                                                                |                                                                                                                                                                                                                                                             |
| Guideline type                                                                                                                              | FH treatment                                                                                                                                                                                                                                                |
| Patients                                                                                                                                    | (1) HoFH<br>(2) HoFH children age 4-6 years old<br>(3) Treatment-refractory HeFH with CAD                                                                                                                                                                   |
| Thresholds for apheresis treatment                                                                                                          | HoFH: LDL-C apheresis and statin or ezetimibe therapy is first-line<br>HeFH: Treatment-refractory with coronary lesion and where LDL-C > 250 mg/dL despite drug therapy or with severe CAD                                                                  |
| Frequency                                                                                                                                   | HoFH: every 1-2 weeks<br>HeFH: not specified                                                                                                                                                                                                                |
| Targets                                                                                                                                     | not specified                                                                                                                                                                                                                                               |
| <b>NICE 2008 (UK)<sup>3</sup></b>                                                                                                           |                                                                                                                                                                                                                                                             |
| Guideline type                                                                                                                              | FH treatment                                                                                                                                                                                                                                                |
| Patients                                                                                                                                    | (1) HoFH after lipid-lowering drug therapy<br>(2) Treatment-refractory HeFH with progressive CHD symptoms                                                                                                                                                   |
| Thresholds for apheresis treatment                                                                                                          | not specified                                                                                                                                                                                                                                               |
| Frequency                                                                                                                                   | not specified                                                                                                                                                                                                                                               |
| Targets                                                                                                                                     | not specified                                                                                                                                                                                                                                               |
| <b>American Heart Association 2006 (USA)<sup>4</sup></b>                                                                                    |                                                                                                                                                                                                                                                             |

|                                                                                                    |                                                                                                                                                                                                                                                                                          |
|----------------------------------------------------------------------------------------------------|------------------------------------------------------------------------------------------------------------------------------------------------------------------------------------------------------------------------------------------------------------------------------------------|
| Guideline type                                                                                     | FH treatment                                                                                                                                                                                                                                                                             |
| Patients                                                                                           | (1) Children with HoFH who are at high risk for early cardiovascular disease                                                                                                                                                                                                             |
| Thresholds for apheresis treatment                                                                 | not specified                                                                                                                                                                                                                                                                            |
| Frequency                                                                                          | Every 1 – 2 weeks                                                                                                                                                                                                                                                                        |
| Targets                                                                                            | not specified                                                                                                                                                                                                                                                                            |
| <b>National Lipid Association 2011 (USA)<sup>5</sup></b>                                           |                                                                                                                                                                                                                                                                                          |
| Guideline type                                                                                     | FH treatment                                                                                                                                                                                                                                                                             |
| Patients                                                                                           | (1) HoFH and treatment refractory<br>(2) HeFH with CVD risk factors and treatment refractory<br>• CVD risk factors include hypertension, diabetes, and smoking                                                                                                                           |
| Thresholds for apheresis treatment                                                                 | • HoFH with LDL-C $\geq$ 300 mg/dL<br>• HeFH with LDL-C $\geq$ 300 mg/dL and 0-1 risk factors<br>• HeFH with LDL-C $\geq$ 200 and 2 or more risk factors or high Lp(a) $\geq$ 50 mg/dL<br>• HeFH with LDL-C $\geq$ 160 mg/dL and very high risk characteristics i.e., CHD, CVD, diabetes |
| Frequency                                                                                          | Every 1-2 weeks                                                                                                                                                                                                                                                                          |
| Targets                                                                                            | not specified                                                                                                                                                                                                                                                                            |
| <b>International Panel on Management of Familial Hypercholesterolemia 2004 (Spain)<sup>6</sup></b> |                                                                                                                                                                                                                                                                                          |
| Guideline type                                                                                     | FH treatment                                                                                                                                                                                                                                                                             |
| Patients                                                                                           | HeFH with ineffective drug therapy and CVD                                                                                                                                                                                                                                               |
| Thresholds for apheresis treatment                                                                 | HeFH patients unresponsive to drug therapy, with LDL-C $>$ 300 mg/dL, without CVD or LDL-C $>$ 200 mg/dL with 200 mg/dL (FDA)<br>HeFH patients with symptomatic CHD with LDL-C $>$ 160 mg/dL or $<$ 40% LDL-C reduction on maximal drug therapy                                          |
| Frequency                                                                                          | not specified                                                                                                                                                                                                                                                                            |
| Targets                                                                                            | LDL-C $<$ 100 mg/dL or 50-75% LDL-C reduction<br>Interval LDL-C $<$ 150 mg/dL level                                                                                                                                                                                                      |

Treatment refractory: high LDL-C levels despite lipid-lowering therapy, FDA= Food and Drug Administration, FH= Familial hypercholesterolemia, HoFH= Homozygous familial hypercholesterolemia, HeFH= Heterozygous familial hypercholesterolemia, CHD= Coronary heart disease, LDL-C= Low-density lipoprotein cholesterol, mg= milligram, dl= deciliter

**Table S3. Apheresis treatment guidelines recommendations**

| <b>The German Apheresis Working Group 2012 (Germany)<sup>7</sup></b>                                                                                               |                                                                                                                                                                                                                                                                                      |
|--------------------------------------------------------------------------------------------------------------------------------------------------------------------|--------------------------------------------------------------------------------------------------------------------------------------------------------------------------------------------------------------------------------------------------------------------------------------|
| Guideline type                                                                                                                                                     | Apheresis treatment                                                                                                                                                                                                                                                                  |
| Patients                                                                                                                                                           | (1) FH patients, genotype unspecified<br>(2) Hyperlipidemia with ineffective drug therapy and CVD                                                                                                                                                                                    |
| Thresholds for apheresis treatment                                                                                                                                 | FH patients with LDL-C > 160 mg/dL, ineffective drug therapy, and CVE in close relatives (primary prevention)<br>Hyperlipidemia: LDL-C > 120-130 mg/dL, ineffective drug therapy, and CVE<br>Severe hyperlipidemia: Lp(a) > 60 mg/dL, ineffective drug therapy, with progressive CVD |
| Frequency                                                                                                                                                          | not specified                                                                                                                                                                                                                                                                        |
| Targets                                                                                                                                                            | not specified                                                                                                                                                                                                                                                                        |
| <b>Recommended Updates to German Guidelines 2013 (Germany)<sup>8</sup></b>                                                                                         |                                                                                                                                                                                                                                                                                      |
| Guideline type                                                                                                                                                     | Apheresis treatment                                                                                                                                                                                                                                                                  |
| Patients                                                                                                                                                           | (1) HoFH<br>(2) HeFH as soon as medical incompatibilities or rapid progression of atherosclerosis is identified                                                                                                                                                                      |
| Thresholds for apheresis treatment                                                                                                                                 | not specified                                                                                                                                                                                                                                                                        |
| Frequency                                                                                                                                                          | not specified                                                                                                                                                                                                                                                                        |
| Targets                                                                                                                                                            | High risk patients with CAD: LDL-C < 100 mg/dL<br>Very high risk patients with CAD and diabetes or unstable angina: LDL-C < 70 mg/dL                                                                                                                                                 |
| <b>Medical Scientific and Research Committee of the Hyperlipidemia Education And Research Trust (HEART-UK) LDL-C apheresis Working Group 2008 (UK)<sup>9</sup></b> |                                                                                                                                                                                                                                                                                      |
| Guideline type                                                                                                                                                     | Apheresis treatment                                                                                                                                                                                                                                                                  |
| Patients                                                                                                                                                           | (1) HoFH<br>(2) Compound HeFH (HeFH with other lipid disorders)<br>(3) HeFH with coronary disease and intolerant or refractory to lipid-lowering therapy                                                                                                                             |
| Thresholds for apheresis treatment                                                                                                                                 | HoFH/compound HeFH: LDL-C reduction < 50% or LDL-C > 350 mg/dL<br>HeFH: LDL-C reduction < 40% or LDL-C > 190 mg/dL with ineffective drug therapy, coronary disease                                                                                                                   |
| Frequency                                                                                                                                                          | Every 1-2 weeks                                                                                                                                                                                                                                                                      |
| Targets                                                                                                                                                            | Acute LDL-C reduction of $\geq 60\%$ (immediately following apheresis)                                                                                                                                                                                                               |
| <b>The Division of Endocrinology, Metabolism, Nutrition and Internal Medicine and Division of Transfusion Medicine at the Mayo Clinic 2001 (USA)<sup>10</sup></b>  |                                                                                                                                                                                                                                                                                      |
| Guideline type                                                                                                                                                     | Apheresis Treatment                                                                                                                                                                                                                                                                  |
| Patients                                                                                                                                                           | (1) HoFH<br>(2) HeFH with ineffective drug therapy and CVD                                                                                                                                                                                                                           |
| Thresholds for apheresis treatment                                                                                                                                 | (1) HoFH: LDL-C levels of 500mg/dL or higher<br>(2) HeFH: documented ischemic heart disease, failure of drug therapy and LDL-C $\geq 200$ mg/dL or failure of drug therapy and LDL-C $\geq 300$ mg/dL                                                                                |

|                                                                                                        |                                                                                                                                                                                                                                                                                                       |
|--------------------------------------------------------------------------------------------------------|-------------------------------------------------------------------------------------------------------------------------------------------------------------------------------------------------------------------------------------------------------------------------------------------------------|
| Frequency                                                                                              | Every 2 weeks                                                                                                                                                                                                                                                                                         |
| Targets                                                                                                | not specified                                                                                                                                                                                                                                                                                         |
| <b>Apheresis Applications committee of the American Society for Apheresis 2010 (USA)<sup>11</sup></b>  |                                                                                                                                                                                                                                                                                                       |
| Guideline type                                                                                         | Apheresis Treatment                                                                                                                                                                                                                                                                                   |
| Patients                                                                                               | (1)HoFH<br>(2)HeFH with ineffective drug therapy and CVD                                                                                                                                                                                                                                              |
| Thresholds for apheresis treatment                                                                     | HoFH: unresponsive to drug therapy with LDL-C >500 mg/dL<br>HeFH: unresponsive to drug therapy with LDL-C >300 mg/dL without CVD or LDL-C >200 mg/dL with CVD (FDA)                                                                                                                                   |
| Frequency                                                                                              | Every 2-3 weeks                                                                                                                                                                                                                                                                                       |
| Targets                                                                                                | Time-average LDL-C reduction of 40-60%                                                                                                                                                                                                                                                                |
| <b>National Lipid Association Expert Panel on Familial Hypercholesterolemia 2011 (USA)<sup>5</sup></b> |                                                                                                                                                                                                                                                                                                       |
| Guideline type                                                                                         | Apheresis Treatment                                                                                                                                                                                                                                                                                   |
| Patients                                                                                               | (1)HoFH<br>(2)HeFH with ineffective drug therapy and $\geq 1$ risk factor                                                                                                                                                                                                                             |
| Thresholds for apheresis treatment                                                                     | HoFH: unresponsive to drug therapy with LDL-C $\geq 300$ mg/dL<br>HeFH: unresponsive to drug therapy with LDL-C $\geq 300$ mg/dL and 0-1 risk factors or LDL-C $\geq 200$ mg/dL with $\geq 2$ risk factors or Lp(a) $\geq 50$ mg/dL or LDL-C $\geq 160$ mg/dL with established CHD, CVD, or diabetes. |
| Frequency                                                                                              | not specified                                                                                                                                                                                                                                                                                         |
| Targets                                                                                                | not specified                                                                                                                                                                                                                                                                                         |

FH= Familial hypercholesterolemia, CAD= Coronary artery disease, CHD= Coronary heart disease, CVE= Cardiovascular events, HoFH= Homozygous familial hypercholesterolemia, HeFH= Heterozygous familial hypercholesterolemia, LDL-C= Low-density lipoprotein cholesterol, Lp(a)= Lipoprotein(a), mg= milligram, dl= deciliter,

## SUPPLEMENTAL MATERIAL REFERENCE LIST

1. Watts GF, Sullivan DR, Poplawski N, van Bockxmeer F, Hamilton-Craig I, Clifton PM, O'Brien R, Bishop W, George P, Barter PJ, Bates T, Burnett JR, Coakley J, Davidson P, Emery J, Martin A, Farid W, Freeman L, Geelhoed E, Juniper A, Kidd A, Kostner K, Krass I, Livingston M, Maxwell S, O'Leary P, Owaimrin A, Redgrave TG, Reid N, Southwell L, Suthers G, Tonkin A, Towler S, Trent R. Familial hypercholesterolaemia: a model of care for Australasia. *Atherosclerosis Supplements*. 2011; 12: 221-63.
2. Harada-Shiba M, Arai H, Oikawa S, Ohta T, Okada T, Okamura T, Nohara A, Bujo H, Yokote K, Wakatsuki A, Ishibashi S, Yamashita S. Guidelines for the management of familial hypercholesterolemia. *Journal of Atherosclerosis and Thrombosis*. 2012; 19: 1043-60.
3. National Institute for Health and Care Excellence. Identification and management of familial hypercholesterolaemia: NICE clinical guideline. 2008.
4. Kavey RE, Allada V, Daniels SR, Hayman LL, McCrindle BW, Newburger JW, Parekh RS, Steinberger J. Cardiovascular risk reduction in high-risk pediatric patients: a scientific statement from the American Heart Association Expert Panel on Population and Prevention Science; the Councils on Cardiovascular Disease in the Young, Epidemiology and Prevention, Nutrition, Physical Activity and Metabolism, High Blood Pressure Research, Cardiovascular Nursing, and the Kidney in Heart Disease; and the Interdisciplinary Working Group on Quality of Care and Outcomes Research: endorsed by the American Academy of Pediatrics. *Circulation*. 2006; 114: 2710-38.
5. Goldberg AC, Hopkins PN, Toth PP, Ballantyne CM, Rader DJ, Robinson JG, Daniels SR, Gidding SS, de Ferranti SD, Ito MK, McGowan MP, Moriarty PM, Cromwell WC, Ross JL, Ziajka PE, National Lipid Association Expert Panel on Familial Hypercholesterolemia. Familial hypercholesterolemia: screening, diagnosis and management of pediatric and adult patients: clinical guidance from the National Lipid Association Expert Panel on Familial Hypercholesterolemia. *Journal of Clinical Lipidology*. 2011; 5: S1-8
6. Civeira F. Guidelines for the diagnosis and management of heterozygous familial hypercholesterolemia. *Atherosclerosis*. 2004; 173: 55-68.
7. Schettler V, Neumann CL, Hulpke-Wette M, Hagenah GC, Schulz EG, Wieland E. Current view: indications for extracorporeal lipid apheresis treatment. *Clinical Research in Cardiology Supplements* 2012; 7: 15-9.
8. Heigl F, Hettich R, Eder B, Arendt R. Lipoprotein apheresis standard for apheresis competence centers--an updated synthesis and amendment to pre-existing standards. *Atherosclerosis Supplements*. 2013; 14: 57-65.
9. Thompson GR. Recommendations for the use of LDL apheresis. *Atherosclerosis*. 2008; 198: 247-55



10. Vella A, Pineda AA, O'Brien T. Low-density lipoprotein apheresis for the treatment of refractory hyperlipidemia. *Mayo Clinic Proceedings*. 2001; 76: 1039-46.

11. Szczepiorkowski ZM, Winters JL, Bandarenko N, Kim HC, Linenberger ML, Marques MB, Sarode R, Schwartz J, Weinstein R, Shaz BH. Guidelines on the use of therapeutic apheresis in clinical practice--evidence-based approach from the Apheresis Applications Committee of the American Society for Apheresis. *Journal of Clinical Apheresis* 2010; 25: 83-177.
